# Supplementary material for: Sex- and tissue-specific expression of chemosensory receptor genes in a hawkmoth
Source: Frontiers journal article supplement (doi:10.3389/fevo.2022.976521), 2022-08-22
Supplement: Data_Sheet_1.zip [file Table S2.xlsx]

## Sheet: Sheet1
NanoString CodeSet Probe Sequence	Gene Name	OGS2.0 name (Kanost et. al. 2016)	GenBank Accession ID/Genomic location	Previous name
GTATACTACTTGTTCCATCAGGTCAGCGGCTGCCTGTTGTTACTGGAATGTTCACAAATGGACGCAGCGGCTTTGATGCGTTACGGCCTTCTAACAGCTG	MsexOR1	Msex2.04798-RA
CCCATCGACTGCACGCACACCGCCAAGTTCCTCACGCTGCTTCTGTACTCGTTTTATGCGACAAGCCTGGTGGGTGTCGGCAACACCACCATGGACTCGT	MsexOR3	Msex2.14357-RA
ACCACTTTACAACAACTATGCGTCGGGAGCTTTTAGCTTTAACAGATCGCCTAACGTGACCTACGAACAGGCCGTGAGCTTGTTGCTACCTTTCGATGAT	MsexOR4	Msex2.13403-RA
GTCGACTACCTTATTATATGGGATGTACGCATTGATCGAGATGGTGAGATCAGGATCAACATTCGTAGGAACGGTAACAGCATGGCCTGACACCACAGAC	MsexOR5	Msex2.07686-RB
TCGACTAAGTCACGAAGAAATGGAGAAGAACTTCGAAAAGGCGTTACAGAATGGAATTAAAGCACACTCTGAAACTTTATGGTGCGTCAAGCAATGCCGT	MsexOR6	Msex2.07682-RA
TTCAAGTTCCAGGCCACCAAATACATGATCCACGATTTGAACAAGCCCGGCGCCAGTCCTGAGGCGAGGTTCGACTCGCCGTACTACGAAATAATGTTCT	MsexOR7	Msex2.07660-RA
TGCGTACCCGTTCGATCCCTACAACATCAAGGTTTGGCCAATGGTGTACCTACGGCAGCTGGGGACAGAAATTGTTACGGTATCCAACATGTGCGTAGCT	MsexOR8	Msex2.01522-RA
GTTGTAACATCCGGTACAACATTCAACATAATGATACTGGCGTGGCCGTTAGTTGACGATCACTCCGTAATAGCCAGTTTGGCAAGGTTCATCTACCACA	MsexOR9	Msex2.09282-RA
ACTGCGTGGGGATTTGCCGATGTCAATCTCAATTCGTTTATGAGGGTGCTTAGCACGGCGTGGTCTTACTTTGCTTTGCTACAAACGGTGTACGGTCAAT	MsexOR10		XM_030184772.1
GTTTAACGAGAGTGCAATTACAATGGGACAAGGTCCATTTGGAGCAGCTATTTGGTGCGTAAGTCCTAAGATACGCCGGGATATCGTAATTCTCGGCATG	MsexOR11	Msex2.11504-RC
AAGACAAAAGCCTAGACGCGTTACGCATTACACATAAATGGTATTTCGCCGTGAACGTGCTAGGAGTGTGGTTCTACAATGTTACACCTATAGCAGTGTA	MsexOR12	Msex2.03330-RA
CGCATTTCAGGTTCTTGAGGCTCTTCGGCGTGGACAACTCAATTTGGAGTTCACATCATTCTTGACGGCTTGCATGCTACAATTCTACTTGCCCTGCTAT	MsexOR13	Msex2.05711-RB
CCTCGTCGTAGATTGGGCTCTGTGGACGATTGTGCCCATAGTCTTCAACTTGAAGAACAGCAAAGCTATAGAAAATAAGGAAATACCATTAAAAACCTGC	MsexOR15		XM_030178262.2
GAGTGCTTCTCGGAGCCGATCCTCACTCAGTTCACAGCATCGACGGTTATTATCTGCGTCACGGCCTACCAACTCCGAATTGAAATCCATCAAAGTAACC	MsexOR16	Msex2.08681-RA
AGTCACAATAACGAAGAACAAGGACGTTGACAAATTACATGAGAATATAAAATCGAAGTTAAAAGTGATTATAAAACGACACCAGTATTTGGCCGAGATA	MsexOR17	Msex2.05573-RB
TGTGTTGTGAAAGTGAACACATTCGTTTTCTGGCAAAGCGACTGGAAACAAGTCCTCGAATACGTTACAAAAGCCGATATGTTTGAGAGACAGAACCAAG	MsexOR18	Msex2.14943-RC
CATGGGCTTTACAAGCACTCTGACATGGTGGATAATGGCGTCGCTAATCAGCGATGAAAGAAGATATCCATATAATGAGATCTGGTTCCCAGTGGACATG	MsexOR19	Msex2.08399-RA
GCCTAATATATCTCACGTTGACGGCTATTGGCATACATGGAAACATGGACGACATAACGGCTGCCCTTGCAGGCGTAGATAAATCCCTCGTTGCTTACAA	MsexOR20	Msex2.11916-RA
AATGGCAAAGCTGAGCGTGGCGACAACAATTACTTCTACTATAATCGTCGTTATTTTCACAGGTTCATCTATGATGGTTGGAGATTTGCCTGCTAGGGTC	MsexOR21	Msex2.11915-RA
GAACGCCCTTCTTGAAGGGTCAACTTCTGATATGGAAGCTATGTTATGCTTGGTATACGCTCTCCATTTCTACAGGAACAGCGTTCATGATGTTCCCAGT	MsexOR22	Msex2.08006-RB
GGGTTGCTGTCCTTTTTGAAAATATTGCCTATAACAGTGAAGAGACGTAAAATATTCGACCTTACAGAACGTCTAGGACGTCTCTATGAAAATATATTGG	MsexOR24	Msex2.00707-RC
ACATATCTCATTTCGTGATGGTAACAGACTTGATCATGCAAGCCCATCTCATACATTTGCTCTGCCAGTTCACGGTCCTTGCGGATTGCTTCGAGAATCT	MsexOR25	Msex2.08017-RA
TTTAAGAGCAGTGCTGTTGGACCTGGTTGTTACTCTGAAGAAAGTCTACAATGATGTGAAGGTGGAACGGCAAATGATTAAGAAGTCGTTGTTGTACTCC	MsexOR26	Msex2.09279-RC
CTGGTTTGGAAACGAGTTGATTTGGAAGAGCACGGGTCTTCGCCAAGCTGCCTTTGATGCTCCGTGGTTGGCCACTGATCCCAAAAATGCCAAATACATC	MsexOR27	Msex2.02512-RA
GGGCGACATCATATGGAAGACCGCTATGTTATTTATGGTCTAGAACCGATGTTCGAAAGTCCAAATTACGAGTTCGCTTACTTCCTGATGACCGCTGGAC	MsexOR28	Msex2.12520-RA
GTGACGATTGATAAATTGAACACACCTGGTAATGAAGAGGTGGTTGCGAAGATGTTGACTGACGGTTTGGTGGAAGGAGTGGAGATGCATTCGAAGTTAC	MsexOR29	Msex2.02514-RB
ATACGCTTTCTCGAAGAATTACAGAGACAACGTGAGAATGGGAACCGAGACCTACCTCCAAGTCGTCAGTTCCTGGGTGCCTTTCGATAAAAACACCATT	MsexOR30	Msex2.11073-RA
CGACTTGCACTTTGTGGGCTATGATTCCTCTCTTCGATGATGCCGGTCATAAGACTTTTCCGTTTAGGATTTGGATGCCTGTAACGGCGGACGAGTCACC	MsexOR31	Msex2.09919-RA
ATAAGCTCTCAACTGACTTGCGGGATGTGGGCTTTGAAGCCGTTGTTTGACGACGTTGGCAGCAGAAAATTTCCTTTCGATATGTGGATGCCGGTAACTC	MsexOR32	Msex2.09918-RB
AGTGATTTACCTTCGGCAGATATGGTCAGAAATTGTGGCCGTATTCAACATTTGCGCAGCTGACTTCGCTTTCTATAACTTCTGCTCCTACATCACTATT	MsexOR33	Msex2.01523-RA
TATACGGTTTGCTCACCGTGGTCACAGTTTTCGGATGGGCAGCCAGTGCTGAGAAAGGCAGCTTACCTTTGCGAGCCTGGTATCCATACGATACTTCAAA	MsexOR34	Msex2.08680-RB
TGCTTTTCTATTGGCACAGCAACGAGGTTACGATCGAGAGCGACCTGGTGTCCTACAGCACCTTCCAAAGCAATTGGGCGCAATCGAACAAGAACATACA	MsexOR35	Msex2.11103-RC
CCAATGGTGTACCTACGGCAGATATGGACAGAAATTGTCGTGGTACTCAACACGATCGCACCTGACTTCGTTTTCTGTATCTTCTGCTCCCACATAACGA	MsexOR36	Msex2.01521-RB
TGAAGATTACGCCCAGGCATTAAAATTCAAAGCTGACGAACAGAAAGTCGTATTGGATTATGCTAAAAAAGGTTTGTACGTATGCCGCCAGTGGCTGGCA	MsexOR38	Msex2.00624-RA
TCTTCTAGGTCAGCATGTTGAGAATGAGCTAGAAGTCGCCGTATTGGAGAAGTGGCATATCTTCAACAAACCACACCAGACAAACGTACGCATATTCCAT	MsexOR39	Msex2.09997-RA/RB
ACTCTTATATCATATCGTGCGTGGTCGCTTACTACTCCTCCCTGACGGTGTATGCCTTGAAGATATTTCTGGGGCAAATGGAGTTGTTTGAACTGGCGTA	MsexOR40	Msex2.05788
TGTGCCGTGCTGGTTTGGGACACGCGTTATGGAGCTGAGTGTGCTTTTATGCTCGTCTGTATACGAATGTGATTGGACAGCAATGCCGAAAAAATTCAAG	MsexOR41	Msex2.07922
GAGGACACTTACGAGACACCGAGGAAGTATTTGAAATGGAGCGGTATTCGGATGAAGCACAACATTTCTAAGTCCTTAAGCATCTGCTGGCTGGTGTACT	MsexOR42	Msex2.01571-RA
GAGGCTTTGGCTATTGGGTAGCAGCGATAGAGCACTCTTTGATCTGTTTCTACGGCGGTGGAGTTGTTGCCAATTACGACTCTAACGCGATAGTCTTAAT	MsexOR43	Msex2.02755
TCAACTAAACGACGACAAGAAATCGTCAATTTTTGGGTGCAGCGGCACGAGAGGTACTTGAAACTGCTTCTTGCCTTGGGAAATAGCGCTCTTACCGCCT	MsexOR46	Msex2.08018
GTGTTGGTCTGAAGCCGCAAGATTCGAGCTTGGATCGCATTATCTGCATGGGAATATTAACTGTCCAAGAAATTACCTCCATAATGGTCGTCGCCAGCTA	MsexOR47	Msex2.04331
TTTCTTAGAATGTGATGCAAGTGTATTGCCCGGCACCCGATATTATAACAACATAATGAAAACTCTAAGAATCGTGAAGCGACGCGCTGTTGGGTACTGG	MsexOR49	Msex2.15272-RA/RB
TACGAGATAGCGTATTTCTTAATGACAGCCGGGGTCTGCTTCATATGCTATCCGCCAGCAAACGTGACGATACTCCTCATCGTCGTGGTCGGTTACACTG	MsexOR50	Msex2.12521
TAGCGACTTATCGGAAGTAGTTTACAGTATACCGTGGCAAAGGATGTCTGTGTCGAATCAAAAGACAGTAATGCTGTTGTTGTTCAGAACACAGCCGGAT	MsexOR51	Msex2.10957-RC
ATGCTCGTTCATCCTATGTCTGCAAGAATGTACCATCGCCACAGCAGTATTGAATTATCAGGCTCTACTCTTACTACTAATAGCCCATACTGCAGCTATG	MsexOR52	Msex2.04330
CAAGATGGCAGGCGCATTGCACATCAGTTTTGGTACAATGCGTCAAACATTATATTAAACTTAAGAGATTCAGTAACGGCCTCAACTATATCTGCCGGCC	MsexOR57	Msex2.09996
CTCATCTGCGTATGAAACTGAAATTGATGACCCATAAAGTGCACAGAGCATTTGCGCACGCGCAGAACACCAACGAGCTCCGAAAAATGGTGAACGAAGC	MsexOR62	Msex2.04326-RA
TACGATAGGAAAGTTGTTACAACATGTGCGCTTGAATCTTACTGCGACATGTACAGCTCGGAGTACGACGAAGCAACCGTGGACGCACTGTGCGACTGCG	MsexOR64	Msex2.08303
ACTCTACCATATCGTCTGGATAATATTCATGGCTAAGGTAGCGTGTGTCTACATCATCGTGATATCGTTGAGCACCTGCATCAGCCACCAATACAAAAAC	MsexOR65	Msex2.09281-RA
CATGAGCGGTGATTTCATGTTCTGTCTGTTCCTAAGCCACATCACCACGCAGTTCAACCTCCTCTCCGTCAGAATCAGGAAGTTGATCTATGTTCCTGTG	MsexOR66	Msex2.01618-RB
CATTCCTTGGCCGCACCAAAGCGATAAATCTTATATACCCACCTTCGCTCTTGAAACGGTGGGGTTACTCTGGACTGGGCATATCGTGATGACCATTGAT	MsexOR67	Msex2.02252
ATGATGCTGCCAATGATGTCAGCCGACTGTATGCCGATCACGCATCTTATCGCAATGACGTACAAGTTTATCACGCTGTGTCGCCACTACAAGAGAATCA	MsexOR68	Msex2.02515
GTTCTTAACAACATATCTCTGACGGCTCTGAGCGTGGTTTGTGTGGTCAAATGCTTTTCCTATGTTCTAAGGCAGGCGAAGTGGAAGGAACTTGTAAAGG	MsexOR69	Msex2.02754
ATCTTAGTGGTGAAGTGGCATGGCTGGTAAATAGCCTTATTTTTGGAGCAGGCACGTTAGAGCAATATACTCACTTGTTGCCTGGTCTCACTCTCGGAAT	MsexOR70	Msex2.04542-RA
GTGGATTTTGCTGCGTTATTGTGGAGAAGTGGAACGAGATGGTCTACAAATCATTTTTGACAACTGCCCTCTCACAAACATGGCTCTTATGCTGGTATGG	MsexOR71	Msex2.04689
TGTTATTATGGAAATCTGGTGAGGCATGAGAGCGAGTCAATGAACACATGTTTGTACGAAAGCGAGTGGACGTCGTCATCTCCTCGGTTCCGTCGGGCGA	MsexOR72	Msex2.06100
GTACTTTTAGACAACTTGTGAGCGAATTGGCGGATATCTGGCCGGTGTCAATTAAAGATAAGGAAGCTGCTCAGATCAAACGAGACAGTCTCTCCGCATT	MsexOR73	Msex2.06834
CGAGTTCCATTGGTGGTACATCGTCGGCATCATGGTGGTAATCGACTGCCTCGGAGTCGCCTCTCTGGTCTTCGTCAGCTATAAATTCAAGCTACTCCAG	MsexOR74	Msex2.09025
TGACCTATTTGTTTGCTATGATGATGCAAATATTCGTGCCGGCCTGGCTGGGCACACAGCTCAGCCACGAAAGTTGTGGGTTGGTTTTCGCCGCATACAA	MsexOR75	Msex2.07920
TCACCTGCACTCTATGGATCATCTTCCCGGTGATATACCATTTGCGCGGGCAACAAGTGGAGTTTCCATTCTGGATCGGTGTGGACTACTCCAATTCGCA	MsexOR76	Msex2.12027
GCAGGATATATACCGCCTGCACAATGTTCAGTGTTACTATGTATGTCACCTTGCCGCTTATCCTTCATTTGTGGACAAAGGAACCCATTCAGAGCTGGGT	MsexOR77	Msex2.08305
TTATCATCCAAGTAGTAGACTTGTTTCTGATCTGGGGTGACCTACCGCTGATGACGGGCACGGCGTTCCTCTTATTCACCAACGTGGCGCAGTTTGCGAA	MsexOR78	Msex2.08682
ATTCTAATATGAAGTTGATGCTGACGATCCTTCAGAATTCTCAGAAGACGATGAGGTTGTCTGCCGGAGGAATGGCGACCATGAGCTTTAGTTGTCTTGC	MsexOR79	Msex2.14948
GTGTACCCATTTAATGCTTACGATATCAAGGTTTGGCCCATGGTGTATATACGGCAGATATGGTCAGAAGTCGTTGTCGTACTGGACGTTTGCGTTGCAG	MsexOR80	Msex2.01524-RA
TTCTTCGGTAATGAAGTTACGCATGAGAGTGAGCGGTTGAAAGAGTCCGTGTATGAAATGAATTGGCTGGAGATTCCCTTGAAGTACCGGCGTACTCTTA	MsexOR82	Msex2.00565
AACTACGCAGTCATGCTGGCCAATCAAGATCTACTGACAAGTATGTTTGAAATAATGAAGGCGGATTATAAGGAAACCCAAAGCTTTATAACTGAAGAAC	MsexOR83	Msex2.04835
TTAAACTGCTGAGTTTTAGAATTGAGAATTTACGGGCAACGTCGAGCGAAGAAACGAAAAGGAACTTTGTGACGTCAGTGATACGACATCAGGAACTGAT	MsexOR84	Msex2.01525-RA
AAGTGTTATAAAGTCGATATCCATCATCATCTATGAGAAGAAAGTGTACCAACTTATGCAAAACTTGAGAATAATGGAAGCACATGAAAGGAATCGAGAG	MsexOR85		XM_030184781.2
CTGACGGTTTTCAGTGCGGTCCTCATGATATTCGTCCTAGCTCTAGCAGGACAGATACTTTATGACGCGAGTTCGCGTGTCGCTGAGGCCGCATACGAAA	MsexOR86	Msex2.07161-d
GCATATCGCTTGCTGCTTACAATACAAGCTGGACTTCGTGGCCCGTCGACATGCAAAAAGACTTGCTGACAGTCATCATAGCCGCTCAAAGCCATTTCAA	MsexOR87	Msex2.09038-u
GACGTCAAGGTCACGTTTGAAAACTGTATTCCAAATGTGTAAGGATGGCTTATCGTCGATTCCCGCAGACAGCACGTCTCATGTTAAAATGATGAAGACC	MsexOR88	Msex2.12902-d
ATTTATTGATAGAAGCGTTGCAGAAGGGAGGGAGTTTCGTGGAACACTCTTTGATGACGCCTTGCATTACAGTCAGTATTTTAGGAACTGTCAAAGTGTG	MsexOR89	Msex2.14612-u
TGATGTTCTATTCTGCGCGTGGTTGATCTTCGCATGTGAGCAACTGCAGCATTTGAAGGCGATCATGAAACCGCTGATGGAGCTTAGTGCTTCACTAGAC	MsexORCO	Msex2.12779-RB
GGGAAGGTGGACTTCATTAACCCTCCGCTCACTTACATCGAGACAAAGTACTACTACAGAATTCCAACAAAAGGTCCTGGAAAGTTCCAGAACCAGTTTC	MsexIR1.2	Msex2.10776		MsexIR1 (Koenig et. al. 2015)
GGCTTACGAAAAGTGAAGGAAGGGAATTGCGCACTACTGTCAGATTACATCACTCTTAACCCTTACATTAGGATGGCGTTTAACTCAGATGAGCTATGCG	MsexIR2	Msex2.13483
GAATCAATGTCAAAAGTGGAGATACCTTACCCGGTAGAAGCACGCAGTTTCTTGGGCGAGGAGCTAATTGTCGGCAGATGTAACTCCAGTTTTGATGGAA	MsexIR4	Msex2.10495-RA
CAAATAAGAGGATCGGATTTGGAACTAGTCAAAATAGCAGCTAAGCAATTTAATGCTACATTGAACTATAACTACGTTAGAAAGAAGGAAGAGAATCCTA	MsexIR143	Msex2.09663-RC
TGCGTTCGTGACGCTGCCAGTCTTTCCGGAGACTGTTGATACTATCGATCAGCTTTTAGCTGGATTCTACAGAATTGGGACCCTAGATCGTGGAGGTTGG	MsexIR21a	Msex2.03713
CCAAAGAATATGTGAGGCGTAATCCCACTTTAGGACTCGCTGTTGAGCCGGTCATCGTGGTTGGCAACAGATCCGACGCAAAAACATTTTTGGAGAATGG	MsexIR25a	Msex2.02645
GACTGGCCTCTATACCGAAGAGACTTACAACGGAACGTTTTCTGAATATCTTGCCGATGAAAAGTTATTACGAATGGACTCCGGGATACGGAGTGCGCAT	MsexIR31a	Msex2.11280
GTGACTGGTGGTCGGGATGACAAACTCTTAGCTCTAATTGCTAAAAAACTAAATTTCAGATACAGATATTACGACCCACCTGACAGGAGTCAAGGGTCAA	MsexIR40a	Msex2.11104
TCTATTTCTTGTATAAGAACTGCTATAACGTGCTTGGCACCAGCTCCGAGAATACTGGCAAGTTGGGAAATGCCCTTGTTGCCTTTCAGCAAACTCATGT	MsexIR41a	Msex2.03121
TCGATCCCTGTACACTTACAACCCTTACGAAAACTACGGGTGTGGGAAATATTACAACAGAGTTGTGAACTTCGGCCGCTGCCCTACATCGGTCAATGTT	MsexIR100f		XM_030164964.1	MsexIR60a1 (Zhang et. al. 2022)
TCCCTTCAGAGAGGACAAACGGACATCGGCGGCTCTCCAATTTTCTTCAGGGCTGACAGAAACGAGATTATTGACTACACAGCTGAGGTTTGGCATTCTA	MsexIR64a	Msex2.05776
TCTGGAGAAACGACAAGTTTCACTACAACCGCTCGTTGTTTGTGGACAAAACTTACAATCTTTATGGACAGCAGTTAAACGCGGTTTACCTGGACCACGT	MsexIR68a	Msex2.13044
GACCACGCATTACAGCCGCTCTCGCTGCCAGAATGTTTCACCTTTGCCATTGGCACTGTTTGTCAACAAGGGTTCTACACGTTCCCGTCATCAGTGTCGG	MsexIR75d	Msex2.11381
ACAAACTGCATAGTGACAGACACGCGGCGTCTTTCGGTCGTCTCATACACGGATTCCGTTGCTCCATACAGAGTGCGGTTCATATTTCGACAGCCTCCAC	MsexIR75p.1	Msex2.09079
GACGATAGACTAAACCTCCACCAAGATTCAATATCGAAGATGTCATACGCGGTGGTTAAGATCTGCTTCGAGATGCTCAATGCGACTGAGAAGCTAATGT	MsexIR75p.2	Msex2.09080+Msex2.09081
AGAACAGAGCAGATCTCGGAACCAACTGCGTATTATTCAAAGATCGTCTCGACATGATCACTTACACCGATCTAGTGGCTCCGATGAGGATGCGGTTCGT	MsexIR75p.3	Msex2.07446
CGGTTAGGAAAGCTATTTACGAGAAAAAAGTCGCGCCGCCCGGCTCTCCGGCGCATTTCATGACACTTGAGGATGGTGTGAAGAAAATTCGAAAGGGACT	MsexIR75q.1	Msex2.01144
CCATACGAGTCTCTGTTCACTAAAACCCAGCACTCATCGAGAAAGTCGCACAAGCAAATCATCAACGGCCGGGAATATTACGTGTACCAGAATGGTGTGG	MsexIR76b	Msex2.07976
TTATAAATGGCACTCCGAAAGGCTGCTTTGGTGACCTGGTAAACAAAGAAGCTGATATAATTGCACCTGCTGCTGTCATGAATTATGAAAGATACAGCCG	MsexIR7d.3	Msex2.05323		MsexIR7d (Koenig et. al. 2015)
TTAAACGTACTCGGCGAAGGGCTGAACGCAACTATTAAAATAATGACTCCGCGTTTTGGAAATGGATGGGGAAAGCTTGAAGCAAATGGATCGTGGTCCG	MsexIR7d.2		XM_030185440.2
CTACATGAAGAACCACTTCCAGTTGCTATGGAGCAGGAGTGTCACCAATTCTGTTCTTGTTCTGTGGTCAGGAAGGCTTAGGATGTACAACTACAATCCA	MsexIR85a		Msex_1.0 scaffold00004, 702277-703528
ACATGACGTTGGTAGTTAGAACTTCAGATCGAGAAGAAAATTGGGGTACCATTTATCCAGACGGCACGGCTACTGGCGCGTATGGTGTACTTAGAAATGG	MsexIR87a		XM_037438237.1
TTTTCGAATTGGAACCGCTCTTGCAGTGCCATGGACTCTACCCAAATTACATCCAGACACAGGTGAACAATTGGTAAACGAAGAAGGGCAGCCTCTTTAT	MsexIR8a	Msex2.10447
TTCTCGATCGTCAGTACCTAGGCGACAAATATCAAGCTGTCTTGGATGAACTGAAGGACTATATCAAGGAACTAGCGAGAGTTGATTTAACCCATGGTGG	MsexIR93a	Msex2.00331
ACTACAGAAGTCTTGCCGTTTTTGACAATCACTGAAAATGCCGACGGAACGTATACTCTTGGCGCTAGAGATGGTATGATCTGGAACACGTTATCAAAAC	MsexIR100a		XM_030163914.2	MsexIRc1
TCAACGCGTGCAACAGGTCTGAGGTGTTGGTAGTGGCAAATAAATGTCATATATTCGACGGCAAAAGTATGTTCCCGGAATTGACAAACATATCCCTCCG	MsexIR100d		Msex_1.0 scaffold00129, 509633-511357	MsexIRc2 (Zhang et. al. 2022)
GTTGGAACATTCAACGCCATATTTCACCGTGCGCTTGGTGTGGTTAGCACCTCCAATCAAACCTGGATCTGCTTGGTGGAGACTCTTCTCTCCTTTAAGC	MsexIR7d.4		XM_030173176.2	MsexIRc4 (Zhang et. al. 2022)
AAAACCGATGAAGTTTTACCCGGAAATACTGTCCGAGTCGCAGTACACGCCCGGAGTGGCTGCCATTACTAAAGTAGCTTCCCAGCTGTTGAACATACTC	MsexIR1.1		XM_037443178.1	MsexIRc5 (Zhang et. al. 2022)
TTCGCAACTGCACGTTCAGAGTAATAGCCAGCGAAGATATACCAAATTTCATCTTCAGTTCCAGTAACTTTACAGTACATGGGAAACCAGTGTTGGGACT	MsexIR100h		Msex_1.0 scaffold00346, 251419-253221	MsexIRc6 (Zhang et. al. 2022)
CTGAAGTTGGCTCAGTACCGCCATCTGTGGGTGGATTTATCGCATATGATGCAGCAATTGGGCCGTGCCTATTCCAACATGTATGGAATTTATTGCATGG	MsexGR1	Msex2.03267
TGGTTCTGTTTCGGGCACTTGCTGTCATGCCTATTACTAGATCGAGGCCAGGAACGATCACCTTCAGCTGGAAATCCTCTGCAACGATGTACGCAATTTG	MsexGR2	Msex2.00159
GTACGAGAATATAAAGCCAGTTTTCACCGTACTTCGACTAATGGGAGTCCTTCCTTTGACACGGCCATCGCCTGGCGTAAATCAGTTCAAAATCGCGTCG	MsexGR3	Msex2.09311
ACCTAAGGTGAGATCTGATCTTCACGTTCATAATGAGATATGGCGACGTATCAGAGAATCGTATGTGCGGCAAGCAGAATTGGTCGGGATGGTTGATAAA	MsexGR4	Msex2.04097
TAGTTTGGGCAATGGTTTGAAAGGAAGACAGAACTATTTCAGGACCGCTTGTCCAAACTATCCAAGTGGACCGTTCGGAGGTTACGAAGCTTCAATCTAC	MsexGR5	Msex2.04094
GACATGTTTTACAATGCTCATGTTCTTTCGAGTGGCGACGGCGTGGCCCGACCTCGTTCAGCACGTGGCCAAAACAGAAGAACTATACCCGAACTACGAT	MsexGR6	Msex2.04092
TTCAATTACTGCACACTCTTGCAGATGGAATAAAGCCTGTACCAAGATGCCGAGTCGGAGTGCCAGATAAAAGACCATTACGAGGTTACGAGCAAGCAGT	MsexGR6.2	Msex2.04096
GGGAAAAACGGCTTTTGAATGGCGGCTTCTACAAAACAATAAGGCTAACATTGCTAACTAGCAGATTTGCCGGTGTATTACCAATAAGTGGGCTTACGAA	MsexGR8	Msex2.04095
ACATCGTCAACAGGGTGCAAAAGATAAGCTCTGAACTAAAAGTGTCCGTCAAGAGCCCGAAGACTTCAGACAATCGACAGTATCGTTACGTGATTATAGC	MsexGR10.1	Msex2.07485
TAGGAGGGTATCAAGCGCCTGCGCATATGAAAAGACTCATCGACTTCGTGAGTAGAGTGCAACAGATTACTTCTGATCTGAATGCTTCGTCCAAGTGCCC	MsexGR10.2	Msex2.13844
AATGGGCCGAAATGTACGGAGACCTCGTGAAGATCAGTAAAGCGTTTAGAAAGTGTTTCTCTGGTCAGAATTTCAAGGGAAAAGGAGGCGGTGTTACAAT	MsexGR11A	Msex2.05028-RA
TTATTCGACATTATGTATGATAAACGGCATGCGCCACTCTAATTATTTCAAAGAATTCGTCGATACATTTGAAAAACTGCATAGAAACTTCGACAACGAC	MsexGR11B	Msex2.05030-RA
ACATAAATTGTGTAAACGCTTAAACTACTTGCTGGATGAAATGCAGACGAAGCTGCATGAAAGCATAATGGAGGATGGAAATATTTCTGATGAAATTGAT	MsexGR11C	Msex2.05031-RA
AAGGAGTGTTTTGGTGCACAGGAAAATTATGGTCTGCCCGATACCACTTTATTAGTAATGAGCCAGCTATACGCGTTCACTTACTACATAGCCGTCGTGA	MsexGR11D	Msex2.05032-RA
TGATAAACGGCATGCGCAACTCTAACTATTTCAAAGAACTCATCGATACCTTTGGAAAACTGCATAGAAACTGCGGCAACGACATAACCTATAATAAATC	MsexGR12	Msex2.05029
ATATATCTTGTGGTGCGGTGCGTCAAATACACGCTACTAGTGGTCATGCCTTGCTACTACTCCAGTATCACTTCTTCCCAAGTGGCTACCATACGTACGA	MsexGR13	Msex2.00832
ATCGGACGAAAATGAACCTATTCCTGCAGAAATTAAAGCTGATAGACATGTATTTGAGGATCAATTACAGACATTACAATTGGGAGTTGTGGAAGATCAT	MsexGR14	Msex2.01718
AGGAGGCGGTTTGAGAGGAATACCATTCCAGTCAACATTATTCACAAGAACGGCGTGGTGAGCAAAACTAGAGAAATGAGGAAATGCCTGATATACTATA	MsexGR15A	Msex2.01729-RA
TCGGATGAGACTTATAAGAAGGAGATTTGAAGAAATCACGATTCCAGTGAACATCATTAACGAAATCGGAGCGATGTGTAAAGTTAGGGAAGTGCGGAGA	MsexGR15B	Msex2.01732-RA
GTGAAGAGAATTACCTCATAAAATACTGCAACACAATTAAGATCAACGACGTCATCATGGGCTTCAAGAAAACAGTTACACTGAACAAACGATTAGCATA	MsexGR15C	Msex2.01734-RA
ATGCTATGTACCTTTACAGATGAGTCCCTGCGATTCGAACTACAAGCGGCTTTGGATTACTTGACTCAACGACCGTTCGGGTTCAAGATCTGGGACGCCA	MsexGR15E	Msex2.01728-RA
TTGGAAGGCGTCACTACGTCTGTAATCATAGTTCAGAGAGATGAAATCGCAGCAAATATCAGACGTGTAAAGAAGTTCTTGAAATATTACAACAATCTGC	MsexGR15F	Msex2.01723-RA
TCAGTGCGCTTTGAGCTACAAAGAGCGCTGCAGTACATCACGATTAGGCCTTTTGAGTACGTGCTGTGGGGCGCGGTGCCTCTCGACGTCACCTTCGTCG	MsexGR15G	Msex2.01736-RA
CGCTTTCTGTGATGTGGCAACATGACACGCTTGCAAAAGAAGAACATCTATCTCCGCGATCTCTGGATATCTTCCATGATGAATCAGTGCGCTTTGAGCT	MsexGR16	Msex2.01733
TCATATAGCGGATATCACGCTGTCTCTCTACACGGGCGACGAATTCTTCTTCAAGTATTATCGCGCCACTGAAACGAACGATATTATCATCGGTAATAAG	MsexGR17	Msex2.01738
GTGGGACTTTAGTAAATTAATGCTACAGATTGAGGTCACCCAAGGGTTCATTCTGGTGTGTCTGCCAGCTGTTATCGCTGACTTGTTAAGGCACGAAGTG	MsexGR18	Msex2.01731
TGCTCGCGGCTTCGCCCGCGTGAAGGTGTTTTCCAGGATAAAATTCCACTATAAGAACACCTACTCTGACATAAAGCGCTTCATCTCGTATGTGGAGGCT	MsexGR19	Msex2.01740
GATCATAAAGATGGCCATACTGACATTTGCACCAGTACTAGCTTGTGAGAAGTTGGCATTCCAAGCGGAAGATATAAAGGCGATCTTACATGACCGTCTC	MsexGR20	Msex2.01741
GACGGCACTGTGAAGCTGCAGACGTTTAATTTTTTGTGCAGACGAGCGAGACCGCGAGGAGATCCAGAAGCTGTTCCTATTCCTGAAACGCAACCCGTTC	MsexGR21	Msex2.12090
TGTGGAGAGTGTTGCCGCTCAACTTGCGCAGTTTGTTGTCCTTTCTCTCCTTCACTATCACCAACAGCATTGCTATTTTACAAATTCAGGACTGGGCTGC	MsexGR22	Msex2.12092
CAAGAACCATCCGCGCAGGTACATTCAAATGTATGAGGCAATCATAGACAGGCTGGAAGCAAACAACGAGACTGTGAAGCTGCAGGTAACGAACACACAT	MsexGR23	Msex2.12093
ATGTGTTTAGACGAACGAGACCGCGCCGAAATCCAGAAGTTGTACCAGTATTTGAAGAGCAACCCGTTCAGATACGTCGTGTGGGGCGCGGTGCCGCTCA	MsexGR24	Msex2.05777
AAGCCATCATGGACCGATTGGAGGCAACCGACGGAGCTGTAAATATACTTGGAGGGCGTCACTACATCTGTAAACATAATAAGGAAAGATGAAATCGCAG	MsexGR28	Msex2.05778
CTTTATGCGTAGTTGAGCGAGACCGCGAGGAGATCCAGAAACTATTCCAATTCCTGAAGAACAATCCGTTCCAGTACAACATGTGGCGTGTAGTGCCGCT	MsexGR29	Msex2.05786
TCAACCACTAAAAACATGGCAGAAGATTTATAGCATCTGTTATATGATACTGTGTGCCTTGGCTTACATACTATACACAACAAATAAGGAAGGGGCGCCA	MsexGR30	Msex2.06168
TGTGGCCGCGCTTCGACGGCGTTAACAAACATCCTCTCCGCACGTTATTCAAGCCTTTATTGATCATACAAGCACCTTTAGGGTGTGCAAGAATCAACGA	MsexGR31	Msex2.06155
GACACCTCCTTCAATACAAAGGTCCTAGACTACGTGAAGCAATTTACGACTCCCTCGATTACATTGAAATTCATGGCATGAAGGTCACGCTATGGGCTCA	MsexGR32	Msex2.04802
ATGTATCATGTGCTTTACAATGAGATGAAAGTGTTGCAGCGTAAACTTAGAGTTGGATTGACCGAAGACCTAACAGAGGATGAGAAAATTAATGTTATCC	MsexGR33	Msex2.04803
CGAGAAGTGAAACGGACTAAGCGTTTGTCTATTAGTATGCTGAGGCAATACCAAGAAGGGCCGTTGCGAGAGAAGGCGAAACGTATGTTAAAAATGATTG	MsexGR34	Msex2.05654
TTATCAACTCCTGGGTAAGTATCACCCAAAGCAATAACAACGTGCAATTATTATTGCTATTGCAAACAAATCATCGATTGATGGAATTTGCCGAAAGGGA	MsexGR35		XM_037443043.1
ACCTGGGCAAGCACCATCCGCGATGGTACATTCAGATGTATGAGACAATCATAGACATGTTAGAGGAAGACAATGACACTGTGAAGCTGCAGTATTATTT	MsexGR37	Msex2.11167
TCGCTCTACTGTACTCTCGTGTAAGGCTGATGAGGCAGATACTGGAAAGCAACGACTTTGACTGCCGGAACCAGGGCAAGCATCATCCACTCCGATACGT	MsexGR38	Msex2.11168
GGAGGCATGCGACGGCACTCAAGACCGCGAGGAGATCCCGAAGCTGTTCCTGTTCCTGAAACGCAATCTATTCCAGTACAGCTTGTGGCGCGTGGTGCCG	MsexGR39	Msex2.11170
TCTACAAGAAGACGCCGCTCATTGAAACAAGAGCGACTAATTACACACCAACGCGTGTCCGTCTTATGGTATACATTTGCCTGATGTTTCTAATCAGGAG	MsexGR40	Msex2.11169
ACACCCTGGCCATCATGAAGTGAAATCGTTAACCAGGTGTTATTTGATGCTAACTGAACAAGTGGTTTACGTCAACAGCATGTATGGGCTTCGGATCCTG	MsexGR41	Msex2.06615
CACTACACAATGTACACAAAAAGGATCATAGATGTCACGGATGTGAAATATGTACAGACTTGTCTGTGGCTGGACTTTATAACTTACTCAATGTGCGTGA	MsexGR42		XM_037442177.1
CATAGCTGTACTTGCCTTCGATTATATAGTAACGGATGAATCGTTGAATCACTCAACACTAAATGTGTTGCGCAAGAGTTTACTATTTGATATGATATAC	MsexGR43		LN885236.1
GAGTTGCAGTTTGCGTTCACAGCATTGTCAGTGCACGCTAGATTCCGTGCTGTTAATGAAGCTCTTGCTCTTACCGCGCGCCAAGTGGCTGTACCTGTAG	MsexGR9.1	Msex2.07484
TGCGCATCATGCTCGGATTTATGGAGAAAGTGGCTTCGGTAGACAACAGTATTGGCTGCCAGTATTCCGGACTCACTGAGCGAAAACTCTGCGCAATTTT	MsexGR9.2	Msex2.13335
GTGCTGTCAGTGAGAATGAGAGAAACCAAATCAGCCAATCAATTCTTCCTCACATCGTCAAGTGTTCACAAGAGTATGGAGTCTCTGAAGGCCAAATCAA	MsexABP1	Msex2.00462
TCTGGAAAAATGTTCAAGAAACAATGCATGGGAAAAAATAAAGTAACGGAAGATGAAATAGGCGAAATAGATAAAGGGAGATTTGTAGAACAGCAAAATG	MsexABP2	Msex2.00465
GGAGGACGTGAAATTGAAGTGCTATATGTTTTGCCTTCTGGAGGTTGCCGGCCTTGCCGATGAAGACGGGACTGTCGATTATGATATGCTGGTCAGTTTA	MsexABP3	Msex2.09425
CCAGAAATGAGGGGGCCGACCAAAAAGGCGATTTCTCAGTGCCTACCGCTCCAGGACCAGTACAGTGATACCTGTGAAGGAGTGTTTCACTCTACAAAAT	MsexABP4	Msex2.00467
AGCATCGCCTAAGAAAATATATCGCATCCCACCGCAGTCATCTGAGAAAATTGTAGAAGAAGTGTTAAAATGCGTTCAGAAGATGGGCCTGGAGTCTACA	MsexABP6	Msex2.03889
CTTGCGGTTGTAGGGCTTAATGCTCACAACGTTCACCTCACGGATGGACAAAAAGAAAAAGCAAACGAGCACATTGCCGCGTGTATCAAAGAAACCGGTA	MsexABP7	Msex2.03892
CAACCTAAAGAAATACGCGCTTTGCATGATGATGAAGTCGGAGCTGATGACAAAAGAAGGGAAATTCAAGAAAGACGTCGCTTTGTCTAAGGTTCCGAAC	MsexABP8	Msex2.01708
GCGTCGACGAGATAGGCGTAGACGAGGGGCTGCTTGCAAAGGTGGACGACGGCGCGGACCTCATGCCCGACCCCAAGCTCAAGTGCTACCTCAAGTGCAC	MsexABPx	Msex2.02108
AAGACGACTTCGCTAACTTCTGGGTTGAGGGTTATGAGGTCAGCAACAGGGATACGGGCTGTGCCATCTTGTGCCTCTCCAAAAAGCTGGATATGATCGA	MsexOBP1	Msex2.05761
CTGACGACGACACTGCCCAGCAGTTGGTCACGATACTACGTGAATGCGAGGCTAAGCACCAGAGCGTCGAGGATGTTTGCAACCGCGCGTTGGAAATGGC	MsexOBP2	Msex2.05763
CAGTTCTGGAAACTGCAATATGCACTTTTGAACCGTGATACAGGGTGTGCCATAATCTGTATGAGCAAAAAACTGGATCTGTTAGACGGAACTGGACGCA	MsexOBP3	Msex2.05760-RE
CAGGATGACTGCATGCTGATTCTGGAAATAGGCAAGTGCTGTAGGGAAGGCGTGAGGAACGCGCATTGGACGCCCGGATCCAAATAATTCATGATTATAT	MsexOBP4	Msex2.05762
TCACCGACTCTAGCCGCATGCATCACGAAAACACTGACAAGTTCATCAAATCGTTCCCTAATGGTGCTGTCCTATCAAAAACGATGGTGGAACTTATCCA	MsexOBP5	Msex2.07430
AGATGGTCCAGCTAATCCACAACTGCGAGAAGCAATACGACGACATCGCGGACGATTGCGACCGCGTGGTTAAGGTTGCAGCCTGCTTCAAGAAGGATGC	MsexOBP6	Msex2.05759
ATCCTTGCTATCAAAAACGGCATTTGCGACGAAAGGAGAGCCGTGTCGTTTGTTCCTGAAGTAGCCGACCACATAACGAAAACTATCAAATACTGCATGG	MsexOBP7	Msex2.03888
TTGAGGATATCATGAACCAGTGCAACGAGACCTTCAGAATTGAAATGGCTTACCTTCAGGCTCTCAACGAAAGCGGAAGTTTTCCTGATGAAACGGATAG	MsexOBP8	Msex2.13843
CCATCCCGTAGACTTTAATGAGCTGATGCAACTACAAAAATTGGTCGTGCCAAAAACCACTGAAGCTAAATGTTTGCTTGCGTGCGCTTACAGAAGTGAA	MsexOBP9	Msex2.00460
CATGATGAAAGAAATTGGCGTCCTCAATGATGAAGGCATGCTTGAAAAGGGACGAGCAATGGAACTAGCAAAGGAGGTTTTCGATGATGCTGAGGAATTG	MsexOBP10	Msex2.00461
TTGTCTTCGGAGTGGCAGCCAATTTGAAACATGCTTACGCTGTGACTGAGGAAGAAAGGCTCATGTTGGACAGCCTTATGAAACCGAAAGTTCTAGCGTG	MsexOBP11	Msex2.00464
TTACATAGCCTGTGTGTACAGTATGAGCCAAGCGGTAAAAAACAATAAGATTATGTACGATAATATGATAAAGCAAGTAGACATGATGTTTCCTCCAGAC	MsexOBP12	Msex2.00466
GCCGACTTGTTGTTACCAGAAGATATAAAAGAACCAGCGAAGGAAGCACTTACGTCTTGCAGAAAAGTGGCGGATTCACATAAGGATGTTTGCGATGCAG	MsexOBP13	Msex2.00468
TGCTGTGTGTGATAAAGTTAACGAAGAAAGCGTAAGCGATGGGCAAAAAGGTTGCGAACGGGCGAAACTAGCATTCCAATGTCTCATTCAAAACTCCAAA	MsexOBP14	Msex2.00463
GTGAAAAACAACAAATATTCCAAGAGTGGGTTCATGATGGTAGTCACGCCGCTCGTCTTCGCCAACAAAAAGAAATTGGATCACATGAAAACTGTATCGG	MsexOBP15	Msex2.01454
ATACTAAAGTGGATCCTGATTTGGTGATCAGGTTTAAAGCTGGCGACTGGAGGAGCGAACAGCCCTCGTTGAAGAATTGGGTACTGTGCATACTAAATAA	MsexOBP16	Msex2.01707
TCTTGCTGTGCTTCTTCAACAAATCCGGCATCATGAACGCTGATGGCAAATTGAACCTCGACGTAGCTCTTGCCAATCTGCCTCCTGGCGTAGATAAGAA	MsexOBP17	Msex2.03890
ACAAGAACACCACCAGCAGAAATAACGATCAAGAATGGAAAGATTCACGTAATTACCAAAAAGATCGCGACAGGGATCGAAATGATGATAATAGGAGAAA	MsexOBP18	Msex2.02300
CGAAGCTCTGAAGAAATTTTTGGACGACTATGCTGAAAAGTATCCCGCTTTCAAGTCAGCTGTTGAGAAAGCTAAGGAATGTGTTAAAGAGGACCTACCG	MsexOBP19	Msex2.02657
CGCATTCGAAAAATCGGGCTTCCTCACAGACAACCTCACGCTAAAGAAAGAAGTATACAAGAAGCATTTACGTCAATGGGCGAAGAACCATGACGGCTGG	MsexOBP20	Msex2.02656
GAAAATGCGATAAAGTGCATAACTGAATCTGGCCTCCAGACTTTTGTTGGGCAAGAAATTAAACAAGGAAAATACACGGATGACGAACGAACGCTTGGAG	MsexOBP21	Msex2.02698
CGATGCGGAGCGACGGCAAGAATGCTACTAAGGTGGGTCAGTTTTATAGATGCAGGGAAGTGACCACTAACAAAGAAATCGTGTACTTTGCATTGCCAAT	MsexOBP22	Msex2.03248
CGTGCATCATCTTCTGCGTGCTAAAGAAGTTCGGCATCATGAGCACCAATGGAGTGATTAATTTGGAGGTATTTAGGAAGCGGGTCCAAAACTCGCACCA	MsexOBP23	Msex2.03518
GCGTACTTCACCAATTCCTCACCCGTTTCGCGCTCGGGGCAATGCTTTGCTGCCTGCATGCTTGAGCAGAGTGATGTGGTTAATCATGGAAAGATAAACA	MsexOBP24	Msex2.03519
CAGGGGGTTTTCATCGGCTGCCCAGCGTACGACATCTTGCATTGCACGCTCACTACTCTTATTAGGAATGCTAACCCAGCCAAGTGGTCTTCCTCTGAAG	MsexOBP25	Msex2.07317
GGACAGGCGTTGATGCATTGCCTGGTTGATCAGTTCATTGAGCACTGTCCAGATGAGAGTTTGCGAAAAGATGACGCTTGCTCTCCCGTCTCGTCGCTTG	MsexOBP26	Msex2.04082
GAAGACGTAGAGCCATTTAGAAAGAATTTAACAGAATGCGCTCGCCAAGTCAAAGCGTCTATGGTCGACGTAGAACACTTTTTGAAAAGGATACCGCAGT	MsexOBP27	Msex2.08382
CAAAATGGATGATAAAGATCTCCAAGCCAGTATAGTTGAGGACTGCGTAGACGGCGACATAAGCGAGTACGGACCGGATGATTTGTGTGATCTAAAGAGA	MsexOBP28	Msex2.10958
AAAACATCCGTGCAAAATCGCAAGAAAGACATCGAACGAGAGCCGGACTGGTCCTATCAGCCCATACCTCCAGAGGTGTCTACCCACGTCGAGCAATTCA	MsexOBP29	Msex2.11541
AGATGATAAAACGGTAAATGCTTTGATATGCGCATGCGTCGCTACTGGATTTGGTTATCCGGACGGAAAGGTAAATGTGGAGAAGATAATGAAGGAGTCA	MsexOBP30	Msex2.13730
AAACTGAACTTTGGAACCTTGTGCAATCAGCGGTGACATCGCAACAATCACGAGCTGCTTTACGTGACCAGATCAGAGCGTGTTTCCAAGAGTTACAATC	MsexOBP31	Msex2.14143
AGTATAAAAAAAACCTAGGAAACGGTTCCCTAATCCTAATATCTTTAGGAGAAAAATGTCGATCACTGGCGCCCGTCGAAGATTGGAGCCGCTACGTTAG	MsexOBP32	Msex2.03893
ATTAAAGCAATCATCTGTATGAATGTAGATTCAGGCGTTGGCACCGCAGACGGAAGGCTTAATGTGGATGCTGTGATGGAGAGGATATTCTCAAACAACG	MsexOBP33	Msex2.03891
CTACTCAGTATTAGGCCGGTGTCTGGAATTTGTGCCCGATATTGCGATAGACTAGCCCGTATACATTATGGGACAGAATACACACGTTGGAAAATGGGTG	MsexOBP34	Msex2.14192
AGCCCATTTATCGATTCCCGCCAAAACAATCAGAGATGTACGTTGAAGCTGTGGTGAAGTGCGTGGCGAAACTTGGTTACGATTTAGCCATCTTAGACCA	MsexOBP36	Msex2.14586
TGGATACGAAAACGGTATGCTTGATGTAGAAAAAACTATGACTGGATTGTTCTCGAAAAATCCAGAAATAAGGCCAATGCTAGAAGAATGTGACCGAGAA	MsexOBP37	Msex2.15032
CAAAGGCCTGATAGATGTCAAGTGCCTCCAGAAGTCATGTATAGACAATGTTGTATATTTCCACCCTTCTTCACGCGGGATATAGCCAAGAACTGCGGTG	MsexOBP38	Msex2.02658
CAAATTTCAAACATTGTTACATGCAGGAGTGGGCGTGGAGCGGGGATATCGCTCCATCTCTTTCTTTCGCACGTAGGGTAATGCCGCTGACGTCACATGC	MsexOBP39	Msex2.12548
TGCAGCCGTAAATACTGGATATGGGAATGCAGACGGTAAACTGAATGTCGAGAAGGTGGTTAAAGAATTGTACCCAGAGAAGCAAGATGTTTGGCCGATT	MsexOBP40	Msex2.14420
CCGGTCCTTCAAGCCATGGTTCCAAAAGACTACTTACTACAGAGGTATCAAAACGAATCATTATATTGCAAACATGGGGGATTTCGCCAATGACCCAGAG	MsexSNMP1	Msex2.12064-RA
GCGCTAGAGCAGTTCTTCAGCAATCTAACAGACCCTTTCATGAGGGTGAAGGTCAAGGACCTGCTGTTCGACGGCGTGTTCCTCAATTGTGATGGAGATA	MsexSNMP2RA	Msex2.03971-RA/RB/RC
GATTGTGGCCATCGTGTTGGCATCATGGGGGTTTCCGAAAATCATCAGCACCAGAATACAGAAGAGCATCCAGCTCGAGAACTCGTCGATGATGTACGAT	MsexSNMP2RC	Msex2.03971-RC/RB/RC
AAACCAGACGTGTGTGAACAACTTCACTCAGTTCCACCCGATACCGACGGAGTACGGTCTGTGTTTCGCATTCAACTCTCGTCTCACCGACACCACTGAG	Msexppk13b	Msex2.02427-RA
TCTATACGATTGGCAGTGAAGAATTTTCCCATGGAAAGACTATCGCCAGCAGCCTCATGCAGCAATCTGGTAGAAAGATGTATGTGGAAGAACGCAATAT	Msexppk16	Msex2.11526-RA
CATAGATAGAGAAGAGTTAAATAGAGCCCGCGAAATAGCCCAGCAATGCAAGTGCTTGCCAGCATGTACTTCCATACAGTATGAAGCAGAAACTTCACAA	Msexppka	Msex2.01672-RA
GGAGCCGAGCCAGATCTAGTCATTCTATTCATCGAGGATAGAAGTCAACTAGACGAGGAATGTAATTCAGTCTACTCAGGACAAAAGGTATACGTGCAGC	Msexppkb	Msex2.13192-RA
TTGTGTATGCATGTATTTCTGAGGTTCGTATCTGGACGCGGGAAGAAAGCGTGTGGGCGGGTTCCTTTATAAGCGTCGGGAAGCTCTTCCATCCAGACAT	Msexppk13a	Msex2_01861-RA
ATCTTAATTTCAAATTGTTCGACGTGGGCGGGCAGCGGTCCGAGAGGAAGAAATGGATCCACTGCTTCGAGGACGTGACCGCGATCATATTCTGCGTCGC	Galphai	Msex2_05855
AGTGCTACGATCGCAGGCGAGAGTACCAACTAACTGACTCTGCTAAATATTATTTAAGTGACTTGGCAAGGATCGAGAAAGCCGACTATCTGCCGACCGA	Galphaq	Msex2_02234
CCAAGTATTTCCTGGACCAGGTGCATATAATAAAGCAGCCGGACTACACGCCCACCGAGCAGGACATCCTGCGTTGTCGCGTGCTCACCTCGGGCATATT	Galphas	Msex2_04914
GACCTTCCCCGGACACGAGAGCGACATCAACGCCGTCACGTTCTTCCCGTCCGGGTTCGCGTTCGCGACGGGCTCGGACGACGCGACGTGCCGCATGTTC	Gbeta13F	Msex2_05211
TCAACTCCAGCCCTCAACAACCGGCCAATATTCGACCAAACATGCTTAACCCAACATTATCAAATGCCCTGCTGAACCCTGGACTGCCAAACTTTTTGTC	pdm3	Msex2_00104-RA
AAACAACAAATAGTGGTGCATCTCAAAATCCCTGATATCGCGCGTGTGGACCTAGCAACTGGGACATCCAGCTTGGCGATTATAACGGTGTCAGCATGTT	fruitless	Msex2_00615-RC
CCTGACAATGTGTCGCAACCCTCAGAAGCTCTCAGCAGTTCGTGTTCTGACAGTGGATTGTCCAGCGATCCGGCAGAGTTCGACTTCGAACAGCAACTAT	xbp1	Msex2_00722-RA
TTTTTGAATGGACCTAATGATGGCGGCAGGATCACAATTGAGACTAGCAGCAGGCAAACAGGTGACCAGATGGAATCTACCGGAGTTATTACTATCTCCA	Eip93F	Msex2_01207-RA
ACTCGTATGGTTTGTACGAACTGATACAAAACTACAGGAGCAAAGAGGTGCAGCGTGGGAAGATGCGTTTTTAGATGCTGTTGGCGTCGCAGAAGATACA	patched	Msex2_01321-RA
GACCTAGCGCTGACGGCGGGGCTGGTATGTATCGTGTATCGTTTGTTAAGCGCCCAATAACAACTTTACTTGCGATGGCACACTGTCCGAAAAGGTATTG	bab1	Msex2_01410-RA
ACACCTTTGCAGGAGAGACCTCGTTCTCGACTAGACTATCGCAATTTATCCGACAGTATTACTCAGTCCATGCTCTATGGGTTGGAAAAGTAATGATTCC	bab1like	Msex2_01411-RA
ACTCGGCAATTACCAACAACTGTGTTTTGGGCAACTACAAAGGAATCGTCCAAGGCATCAGTACCGTTTAGACCATCACAAGGGATACTCCAACTACCAG	bab2	Msex2_01414-RA
TAGCGTATTTCGTCCTTAAAAGATGCTCTATAAGGGATGGTTGTGCTCCGTTATTTTAGTGTCAGCATGTCGCGCGAGCCAGTACGACACCGGTGGAGAC	smoothenedRA	Msex2_01637-RA
TTAAAAGGTATTGAAGCTAATAACGATGGATTACGGCCATCCTCAACCGAATCTGTCAATGCCTCCACCCGGCATGGGCATGGGTCCTCCTATGGGCCCG	smoothenedRB	Msex2_01637-RB
TGTCCATAGCCTCAGTTCTGCGCTTTATGAGCGCTGTAAAGGACTTGAATAGTGAATCATTCCGCGCTTCTTGGATACTGAGTTTGTTTGGCACACTGGC	ap	Msex2_02074-RA
ACTGCACCCAGACACAGATACCGACCCGCGCGAACTTGAAGCCTTCGCCGAGCGGTTCAAACAGAGAAGAATCAAACTTGGCGTCACGCAGGCAGACGTC	acj6	Msex2_02088-RA
TGAGGCGTCAGGGTTCCCAAGTCCTAGGTCGTTAGGGTATCCTTTCCCTCCCATGCATCAGAACACGTATGGGTACCACTTAGGATCGTACGCTCCTCAG	dll	Msex2_02539-RA
AAACTTGTGGTATCATCGCACGGCAGCAAAAACATAAAGAAGGTGTGAAGCGGCGCCAAGAAACTTTGGGTGTACATTAGGACAATTAATCATTTGGAGA	lz	Msex2_02593-RA
ACATGTTCATACTGTGGCAAAGCGTTTCCGCGCAGCGCAAACTTAACGCGACACTTAAGGACACATACAGGTGAACAGCCGTACCGTTGTAAATACTGCG	ham	Msex2_02625-RA
GTACGATCTGGTGTGCGCTGGGGTAATGCACGATATGTATATTGGATACTACGTTAGACGAAACCTGTTCTGGTTGGTCATGCCCTCTGTACCGCACCAT	coup transcription factor 2-like isoform 2	Msex2_02855-RA
TTTAAAGAAACAGACACCTTTACATTTGGCCGCTGCGAGTGGACAAATGGAAGTTTGTAAACTTTTGCTAGAACTCGGAGCGAATATAGACGCGACTGAC	nompC	Msex2_02930-RA
CTAAAGGCGCAGACGCCAGTTTGAAGAATCACCGCGGATTTACGGCGCTGCACCTCGCCGCGCGCTCTTCCAGTTTGGAATGCGTCGAGTCTTTACTCCG	wtrw	Msex2_03232-RB
AGCTGCGCGCCATTTGCACCGTTATTACCGCGCATGTGTTGGCAGCACTGGGCCGTTTCCTCCAAGCCGCCGTCCGACGCCATTACCACGCCATCGGACA	smt3	Msex2_03266-RA
ACACTTGTTGTGTTAGCAGCGAGCCCGTAGCCCTTATTTATACACGCGAAGTGTGTCATTGCGCACTCGCGCTATGTTCACTGCGCGACATATCGTAGTG	protein sex-lethal-like	Msex2_03589-RA
CATGATGAAGAATTTAGCTGACATTTCACTTGGAGGGCTAACGTACTGGATCTTTGGTTACGGCATGTCGTTCGGAGAGGGCACGTACTCGAACCCTTTT	amt	Msex2_03837-RB
ACTCACAAAAAAGTTCGTCGCATTGCTAAAGTCATCGCCTAACGGCGTTCTCGACTTGAACATAGCGGCCGAACATCTCTCGGTCCAAAAGCGTCGCATA	e2f2	Msex2_04127-RA
AACTGCTCACAGATTTTGGATACGACGGGAACACAGTGCCTATTATTTGTGGATCAGCTTTGAAAGCGTTGAATGGAGATGAATCAGAATATGGCGCACC	ef-tu	Msex2_04234--RA
TAGCAGCCACAGATGGTGTTATGCCTCAAACGCGTGAGCATTTGGTGCTTGCGAAGCAGATTGGTATTGAGCATGTTGTAGTGTTCATCAACAAGGTGGA	mip120	Msex2_04337-RA
TGAATTGACTGTGACATTAGGTCCGCGGTTTTGTTCACACCAAGACTGATTTGCGTACGTAAATCCTTCTCTGGATATTGTAAGATTGGCCCTGGATAGG	cut	Msex2_04860-RA
ATCTCGGCATTAGCAGACGGAAACAAGTCACACATCCCTTACAGAGATTCAAAATTGACCCGTATTTTACAAGAGTCTCTTGGTGGTAACGCCAGGACTA	repo	Msex2_04977-RA
CTTCATCCTCGGCTGTTTCCTCCAAGGAGACGCCGGCAAAGTCCTATTCGTCGCCATTCTCGTGCTATCAACGTTCTGCGTGGGCCTCAAGTCCGCGCAG	hedgehogRA	Msex2_05464-RA
CGCCTTCGACACTTTAAGGCGGGCAGTGCCAGCCTACAGTCATAATCAAAAACTGTCCAAGTTATCAGTGTTGCGGATAGCTTGCGCGTACATTACCGCT	ato-like	Msex2_05539-RA
CTTTTGGGCCTGCCGCTCTTGGGCTGCATAGAGTCGGCACCAAATTGCCGCCAAAGCCAACGCCTAGTGAACCCGTGCAAAAATTGAATGCTAGAGGTAT	mip130	Msex2_05659-RA
CTCCGATCAAAAACTATTTGTCGCAAGCCTCCGCCACAAATGAATGCAACCAGGACACAGTAACATATTCAGTGCAAGCGGACGAGTTGAAGGAGATAGT	myb	Msex2_05747-RA
CTTTAAGGGTGGGTTTAGATTGGCGAACGCGCGGTATGTGCTTACTGCAACTGTACACTGTGTAAGATGCCTTATTCGGCCCAGCAACAAATAATATCGC	Fer1	Msex2_06023-RA
AATGAGGCTTTATATGACATCTGCTTCCGCACGCTCAAACTCTCCACACCCACCTATGGTGATCTCAACCACTTGGTATCCCTCACAATGTCCGGTGTCA	betatub56D	Msex2_06073-RA
GGTGAAGGGAATAGAGGTCGTTTGGCTTTCCGGATATCATCTCACTTGCCATATCAAGCGCAACAGCAAGCTGTAATTTCACATCGGTTTTCTGTGAGGC	pyx	Msex2_06591-RD
AGCCAAGAACGCTGGAGATATTATTGTAGTGTAGGTTTAAGTGTCTGCGAAATACACAGGTGCACTCTCTGTTTCTTCACTCACATAGTCCGGTGAGACG	ems	Msex2_08064-RA
AAGTCAATGAAGTCTCGCATCAGGTATGGATGTTCCAAAGATTCACAGTGGTGATGGAATACGAACAGAAGCCAGTGCTTCCGCCACCGTTGATAATCTT	Trpm	Msex2_08497-RA
TCGAGGGACCAATGCGTCAGTCACGTGTTACTCTCTCAACCAATCACAATAAAGCGACAAGGAATCACGTCGCGTTTTTGGCCACATTCTAAACACAAAA	iav	Msex2_09382-RC
CGCATAGCAGCGGGTATCGCCTTCGTGTTATATGAACATCAATATGAAGCGGAGAGAGCCATACAAAATATAAATGGCACTACACCACCTGGCTTTTTAC	found in isoform d	Msex2_09531-RA
GACGAGGATGAAGAGATCAGCGTCACGTAGGTGCGAAAGGCATAGAATGATCTGGACTTGGATGCGTAGTTCGATTTATATGAGTTAGAAAGAGAGAGGG	engrailed	Msex2_09618-RA
CTAAACCAAAATGTCCTCAAGAATCACCTCCGAGTCCACCAATATCACTTATAACAGCTCTTGTCAGAGCTCATGTGGATACATCGCCAGATTTTGCCAA	HR38	Msex2_10087-RA
TGTTTCCCTTCAGGACAGAACATCCGTAAGATGATCAAGGATGGTCTTGTCATCAAGAAGCCTGTTGCTGTGCATTCCCGCGCTCGTGTCCGCAAGAACA	Rpl19	Msex2_10311-RB
TCTCTGCGTCACTCTCGGTCGCGTATCAACGCGTACCGTGCCTTGGCTTCACCTTCACTCATTGCGCTCTCCTCCAAGGATCCCATCCTGACAGCTTTCG	Trpgamma	Msex2_10490-RB
TGGAGAGCGACGTCACCAAGAGCATCCGCACCGTCATCAAGGCCTGCGAGGACGACCCTGAGTTCAACGACTACCACCTGGTGGACTACCTGACCGGAGA	onecut	Msex2_10679-RA
ACCTGCCTTACGACGGAGTTCAGCCTACTTCTTCAACATTGACTCCGATGCACCTACGCAAAGCCAAGCTGATGTTCTTCTGGGTGCGGTATCCAAGTTC	prospero	Msex2_10751-RB
CTTTATCCACGAGGGATTCGTACGGATCTACGATCACGACACCACAACCACATACAAACCGATGACATATTCAATCTTCTAAACAGAGTGTCCGGCCGCG	pdm2	Msex2_11095-RA
TGTCTAGATCAGTTATACTTGACCTACGACCTGCCAGGGTTTTGGATGCGGCCCGCTGAGCGTTTAGTGGCCCACGTGACTTTCAAAATACCACCTAAAT	elav-like protein 4 isoform 5	Msex2_11794-RA
TCGGAGTGCTTCATTCACGGACGTTTATAATATAGCAATAACGGCTGGCCTGTCAAAAATTGTAAACACAGCACACGTGCCCGCTCGCAAGAGGCGAGAG	dan	Msex2_12564-RA
TAATCTTGTATATCGTGGCAGACGAGCCGCCCGCGTTCGTGTTAAGGCAAACTAGACGTTATGGATATGTTAAGTGAACTGCGTGACACCATGTGCGAAG	sev	Msex2_12610-RA
GCTAAACCCAAAGGCGAGAGGAAAGGCAAATCTGCCATAAACGAAGTTGTGACTCGTGAATACACAGTGAACTTACACAAGCGCCTTCATGGTGTAGGAT	RL31	Msex2_13132-RC
TCCAACCTGCAGAGCCACAGCCGCTGCCACCAGACTGACAAGCCTTTTAAATGCAACTCGTGTTACAAATGCTTCACGCACGAAAAGGATCTGCTCGAGC	rn	Msex2_13396-RA
CTGCATGATATCGGCCTGGTTATTAACAAGCTTATTGGAGGAGCTTACAGGTGCTACTACACGCGTCGCAAATTCCGTCCGATCTACGCGAAGGTGATGA	melastatin	Msex2_13433-RA
TCAAGACCTGGTATCAAAATCGGCGGACGAAATGGAAGCGTCAAACGGCTGTTGGTTTAGAGTTGCTGGCCGAGGCGGGCAACTACGCGGCGTTCCAGCG	barh2	Msex2_14116-RA
GAGCTCCTCCTCGTGCAGCTCCATCGAGGGCTCCGACGTCAACCAGTACAACTACACCAACCTGATATCGTTCTACCAGAACCAGAACGGTCGGCAGGTG	sim	Msex2_14147-RA
TTCCCGAGGGTCCGTGCCTATTGTGCTAGAGACCTCGCAAGTGACGAAGGTTGAGAGTGTGGTGTCGCAGGACCAGTACCACATGGTGTACCACCAGCGC	zf30 homolog	Msex2_14873-RA
ATCGGTCTCCGATATGGCTTCTCTCAAGTTCAAGAGGATGCTGAACAAGGAACTGAGCCACTTTTCGGAGTCCAGCAAATCCGGAAACCAGATCTCCGAA	dunce	Msex2_04377
AAGTATGTGCAACAAACGACTAATTCACCTGTGGACATGCGAGTCGGTATTCACACAGGAGCCGTGTTAGCCGGAGTTTTAGGTCAACGGCAGTGGCAGT	acl3-l	Msex2_03154
AGCCGGCTGTTCATGCACTACGCACCGCACATACACTCGTTGTGGCTCGACAGGGCCATAAAAAGGGCCTATGACAGGCGAAGAGAATTTCAATTGAGTG	concertina	Msex2_05033
GAAACAATGGAGTACGAAGCGAATTTCGTATGCACGACCTCGCAAGAAGGGAAGATACAGTTACACTTGACCACGGAAAGCGAACCAGTGGCGTACCTCT	gcas	Msex2_03530
CGCTCCGTGCACCGCGAGAAGGCCACGCACGTGCATCTACTCACTTTGTGCTTTAAAGACGCTGATAAAGAATCTCAGTACCGCGCGTCGACGGACGGCG	rut	Msex2_01291
