# Supplementary material for: Sex- and tissue-specific expression of chemosensory receptor genes in a hawkmoth
Source: Frontiers journal article supplement (doi:10.3389/fevo.2022.976521), 2022-08-22
Supplement: Data_Sheet_1.zip [file Table S3.xlsx]

## Sheet: Tabelle1
			ORs	Antennae	Labial palps	Proboscis	Forelegs	Midlegs	Hindlegs	Forewings	Hindwings	Ovipositor		IRs	Antennae	Palp	Proboscis	Foreleg	Midleg	Hindleg	Forewing	Hindwing	Ovipositor		GRs	Antennae	Palp	Proboscis	Foreleg	Midleg	Hindleg	Forewing	Hindwing	Ovipositor
x	expression detected		MsexOR1	x										MsexIR1.2	x		x								MsexGR1		x
	in only one tissue		MsexOR3	x			x	x				x		MsexIR2											MsexGR2	x	x	x	x	x	x	x	x	x
	in 8 or 9 tissues		MsexOR4	x										MsexIR4	x		x	x	x		x	x	x		MsexGR3	x	x	x		x	x	x	x	x
			MsexOR5	x	x									MsexIR143			x						x		MsexGR4
Msex?R?	not detected		MsexOR6	x	x		x	x	x					MsexIR21a	x						x	x			MsexGR5					x
			MsexOR7	x								x		* MsexIR25a	x	x	x	x	x	x	x	x	x		MsexGR6	x			x	x				x
			MsexOR8	x	x	x	x	x	x	x	x			MsexIR31a	x										MsexGR6.2
			MsexOR9	x		x				x		x		MsexIR40a											MsexGR8	x
			MsexOR10	x	x									MsexIR41a	x										MsexGR10.1
			MsexOR11	x										MsexIR100f			x	x	x			x	x		MsexGR10.2
			MsexOR12	x	x					x	x	x		MsexIR64a											MsexGR11A
			MsexOR13	x	x									MsexIR68a		x	x	x	x	x			x		MsexGR11B			x
			MsexOR15	x										MsexIR75d									x		MsexGR11C
			MsexOR16	x								x		MsexIR75p.1	x										MsexGR11D				x	x	x
			MsexOR17	x			x	x				x		MsexIR75p.2	x			x	x	x					MsexGR12		x	x
			MsexOR18	x										MsexIR75p.3											MsexGR13			x						x
			MsexOR19	x										MsexIR75q.1	x	x	x	x	x		x	x	x		MsexGR14	x
			MsexOR20											* MsexIR76b	x	x	x	x	x	x	x	x	x		MsexGR15A
			MsexOR21	x										MsexIR7d.3	x	x	x	x	x	x	x	x	x		MsexGR15B	x
			MsexOR22	x										MsexIR7d.2		x	x	x	x	x	x	x	x		MsexGR15C	x			x	x				x
			MsexOR24	x										MsexIR85a											MsexGR15E				x					x
			MsexOR25	x								x		MsexIR87a	x										MsexGR15F		x		x		x
			MsexOR26	x								x		* MsexIR8a	x								x		MsexGR15G									x
			MsexOR27	x	x					x	x	x		MsexIR93a	x			x					x		MsexGR16
			MsexOR28	x		x								MsexIR100a			x	x		x	x	x	x		MsexGR17
			MsexOR29	x										MsexIR100d	x				x				x		MsexGR18
			MsexOR30	x				x	x		x	x		MsexIR7d.4											MsexGR19
			MsexOR31	x										MsexIR1.1	x								x		MsexGR20	x						x		x
			MsexOR32	x		x				x		x		MsexIR100h											MsexGR21
			MsexOR33	x																					MsexGR22
			MsexOR34	x										* IR coreceptors											MsexGR23	x	x						x	x
			MsexOR35	x	x	x	x	x	x	x	x	x													MsexGR24
			MsexOR36	x																					MsexGR28
			MsexOR38	x			x																		MsexGR29
			MsexOR39	x	x																				MsexGR30
			MsexOR40	x	x					x	x														MsexGR31	x		x						x
			MsexOR41	x																					MsexGR32
			MsexOR42	x																					MsexGR33
			MsexOR43	x																					MsexGR34				x					x
			MsexOR46	x	x																				MsexGR35	x		x	x	x		x
			MsexOR47	x	x	x	x	x		x	x	x													MsexGR37
			MsexOR49	x																					MsexGR38
			MsexOR50	x								x													MsexGR39	x	x	x	x	x				x
			MsexOR51	x		x																			MsexGR40
			MsexOR52	x	x	x		x		x	x	x													MsexGR41	x	x	x	x	x	x	x	x	x
			MsexOR57	x			x	x																	MsexGR42	x		x	x	x				x
			MsexOR62	x																					MsexGR43
			MsexOR64	x	x	x	x	x	x	x	x	x													MsexGR9.1
			MsexOR65	x		x						x													MsexGR9.2
			MsexOR66	x								x
			MsexOR67	x
			MsexOR68			x				x	x	x
			MsexOR69	x
			MsexOR70			x	x	x				x
			MsexOR71			x	x	x		x	x	x
			MsexOR72	x			x	x
			MsexOR73							x	x	x
			MsexOR74				x					x
			MsexOR75	x		x	x	x	x	x	x	x
			MsexOR76	x
			MsexOR77	x	x	x	x	x	x	x	x
			MsexOR78	x
			MsexOR79	x			x
			MsexOR80
			MsexOR82	x		x	x	x	x			x
			MsexOR83	x				x		x	x	x
			MsexOR84	x	x	x	x	x	x	x	x	x
			MsexOR85	x
			MsexOR86	x
			MsexOR87	x						x		x
			MsexOR88		x							x
			MsexOR89	x	x	x	x	x	x	x	x	x
			* MsexORCO	x	x		x					x
			* OR coreceptor
